# Supplementary material for: The Impact of Backbone Fluorination and Side-Chain Position in Thiophene-Benzothiadiazole-Based Hole-Transport Materials on the Performance and Stability of Perovskite Solar Cells
Source: MDPI journal article supplement (doi:10.3390/ijms232113375), 2022-11-02
Supplement: s1 [file s1]

## Supporting Information

# The Impact of Backbone Fluorination and Side-Chain Position in Thiophene-Benzothiadiazole-Based Hole-Transport Materials on the Performance and Stability of Perovskite Solar Cells

M. M. Tepliakova <sup>1,\*</sup>, I. E. Kuznetsov <sup>2</sup>, A. N. Mikheeva <sup>1</sup>, M. E. Sideltsev <sup>2</sup>, A. V. Novikov <sup>1</sup>, A. D. Furasova <sup>3</sup>, R. R. Kapaev <sup>1,8,9</sup>, A. A. Piryazev <sup>2,4,5</sup>, A. T. Kapasharov <sup>2</sup>, T. A. Pugacheva <sup>2</sup>, S. V. Makarov <sup>3,6,7</sup>, K. J. Stevenson <sup>4</sup> and A. V. Akkuratov <sup>2</sup>

<sup>1</sup> Center for Energy Science and Technology (CEST), Skolkovo Institute of Science and Technology,  
Nobel St. 3, 143026 Moscow, Russia;

<sup>2</sup> Federal Research Center of Problems of Chemical Physics and Medicinal Chemistry,  
Russian Academy of Sciences, FRC PCPMC RAS, Academician Semenov Avenue 1,  
Chernogolovka, Moscow Region 142432, Russia;

<sup>3</sup> School of Physics and Engineering, ITMO University, Kronverksky pr. 49, 197101 St.  
Petersburg, Russia;

<sup>4</sup> Lomonosov Moscow State University, Department of Chemistry, GSP-1, 1 Leninskiye Gory,  
119991 Moscow, Russia;

<sup>5</sup> Sirius University of Science and Technology, Olympic Ave, 1, 354340 Sochi, Russia

<sup>6</sup> Harbin Engineering University, Harbin 150001, China

<sup>7</sup> Qingdao Innovation and Development Center of Harbin Engineering University, Qingdao  
266000, China

<sup>8</sup> Department of Chemistry, Bar Ilan University, Ramat Gan 5290002, Israel

<sup>9</sup> Bar-Ilan Institute of Nanotechnology and Advanced Materials, Ramat Gan 5290002, Israel

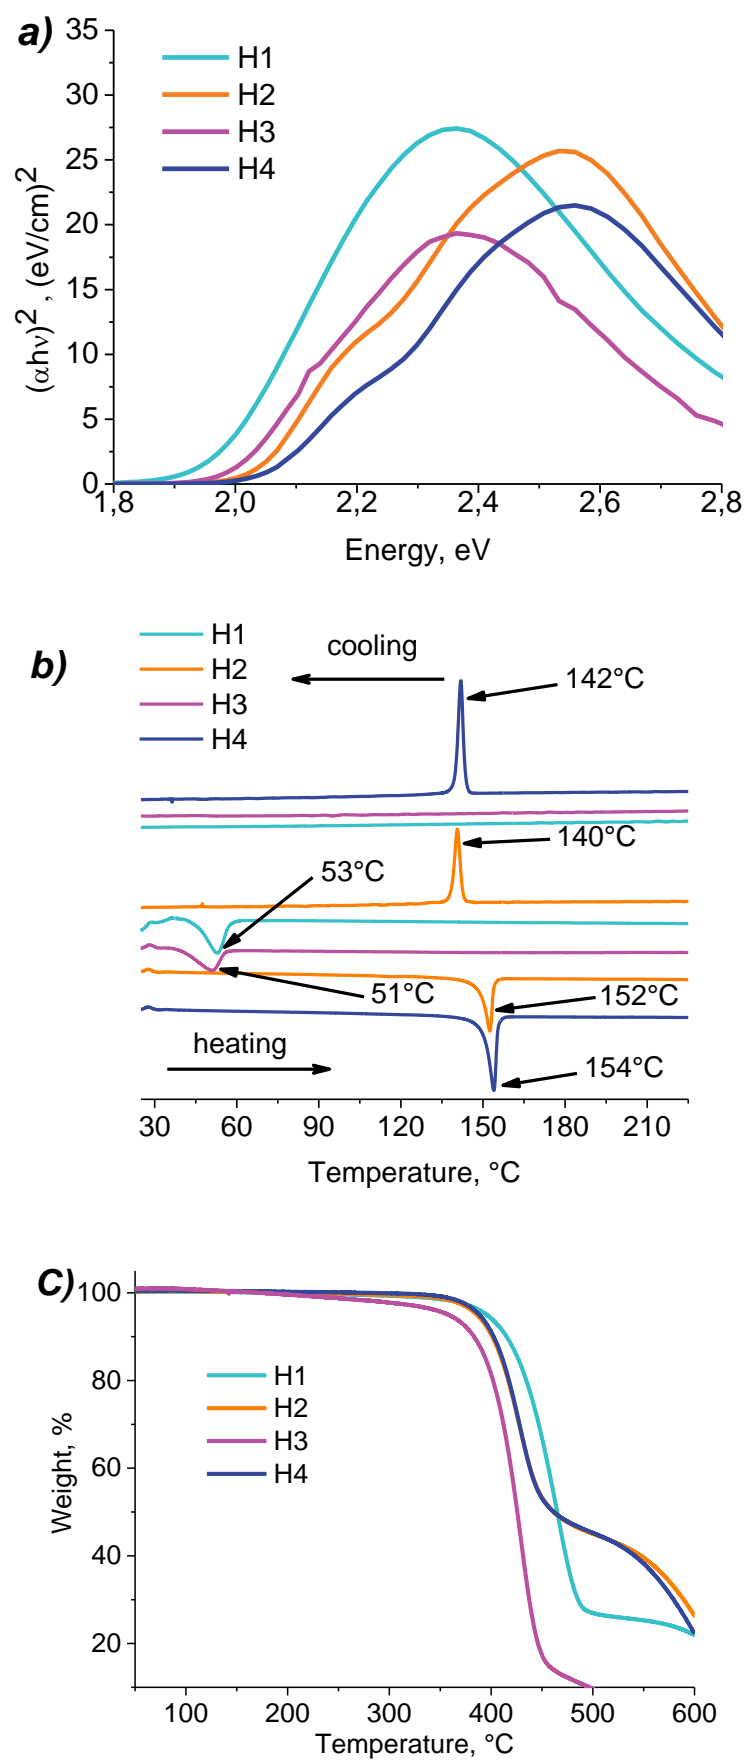

**Figure S1.** Tauc plots (a), DSC curves (b) and TGA (c) for H1-4

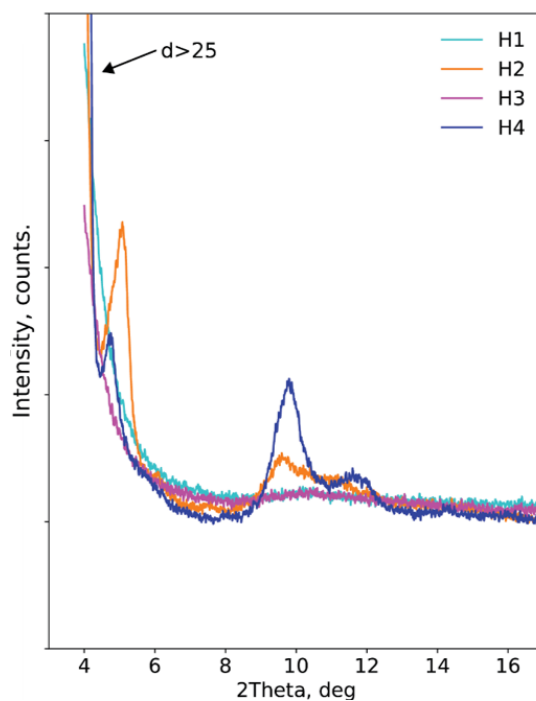

**Figure S2.** Selected regions of the XRD patterns of **H1-4**

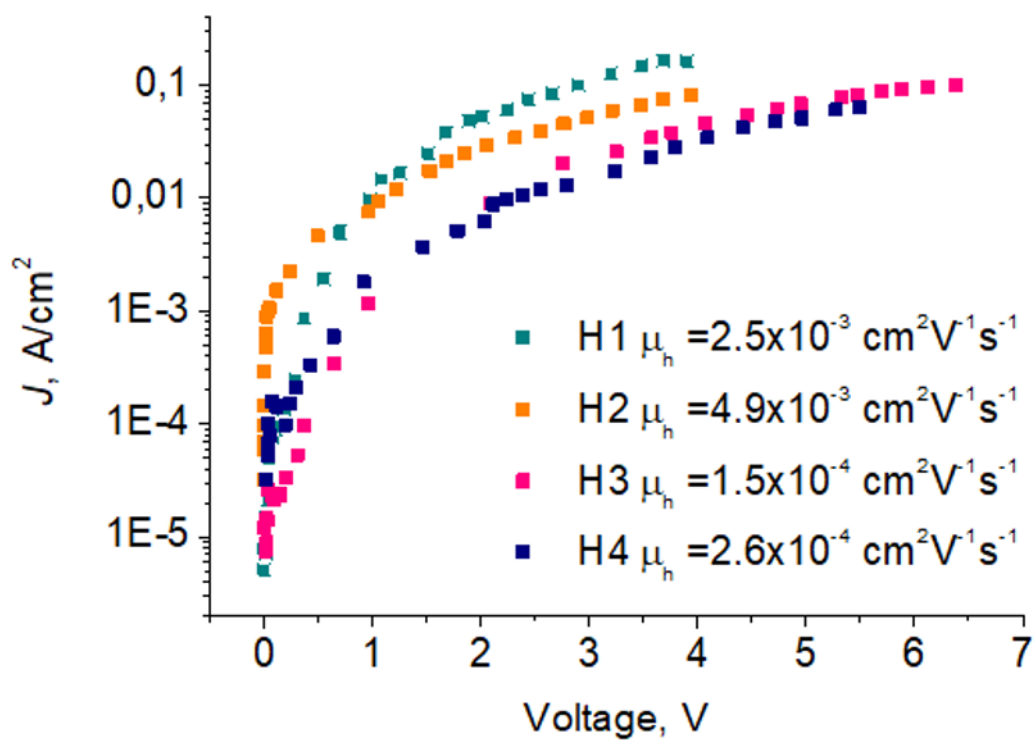

**Figure S3.** J-V curves of hole-only devices based on compounds **H1-H4**

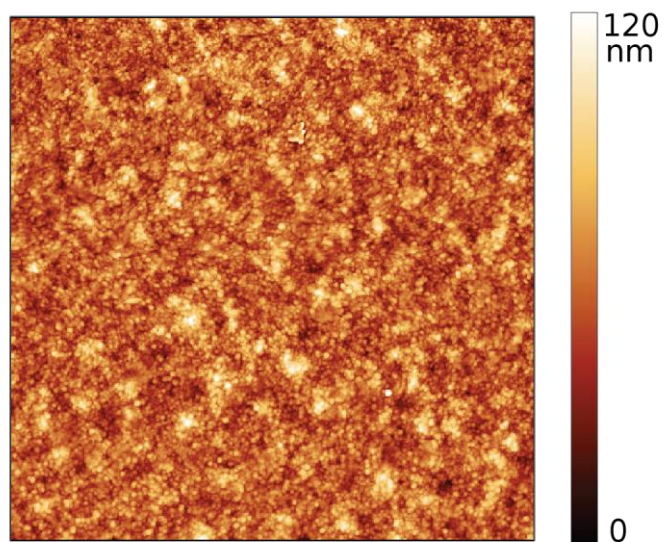

**Figure S4.** 30×30  $\mu\text{m}$  AFM scan of bare perovskite layer.

| HTM          | $V_{\text{OC}}$ , mV | $J_{\text{SC}}$ , $\text{mA cm}^{-2}$ | FF, % | PCE, %  |
|--------------|----------------------|---------------------------------------|-------|---------|
| Spiro-OMeTAD | 910±60               | 16.1±0.5                              | 46±10 | 7.0±2.0 |

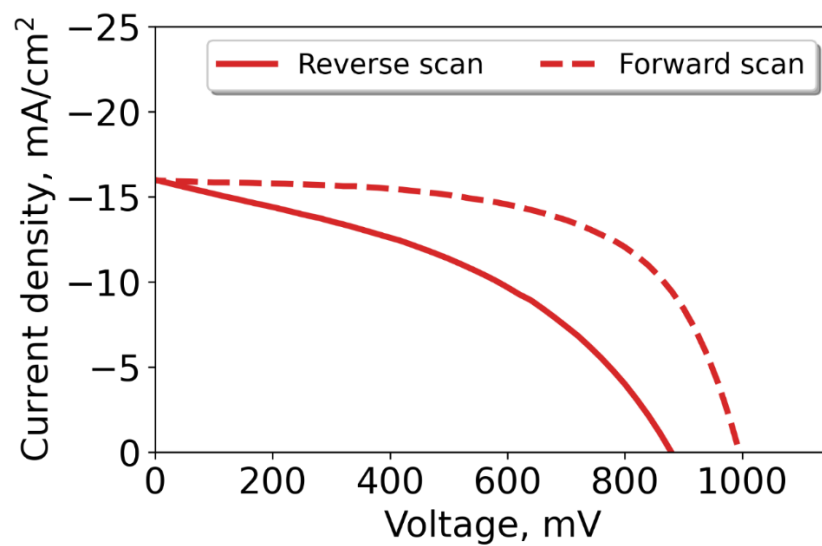

**Figure S5.**  $J$ - $V$  curve for PSCs with spiro-OMeTAD as HTM.

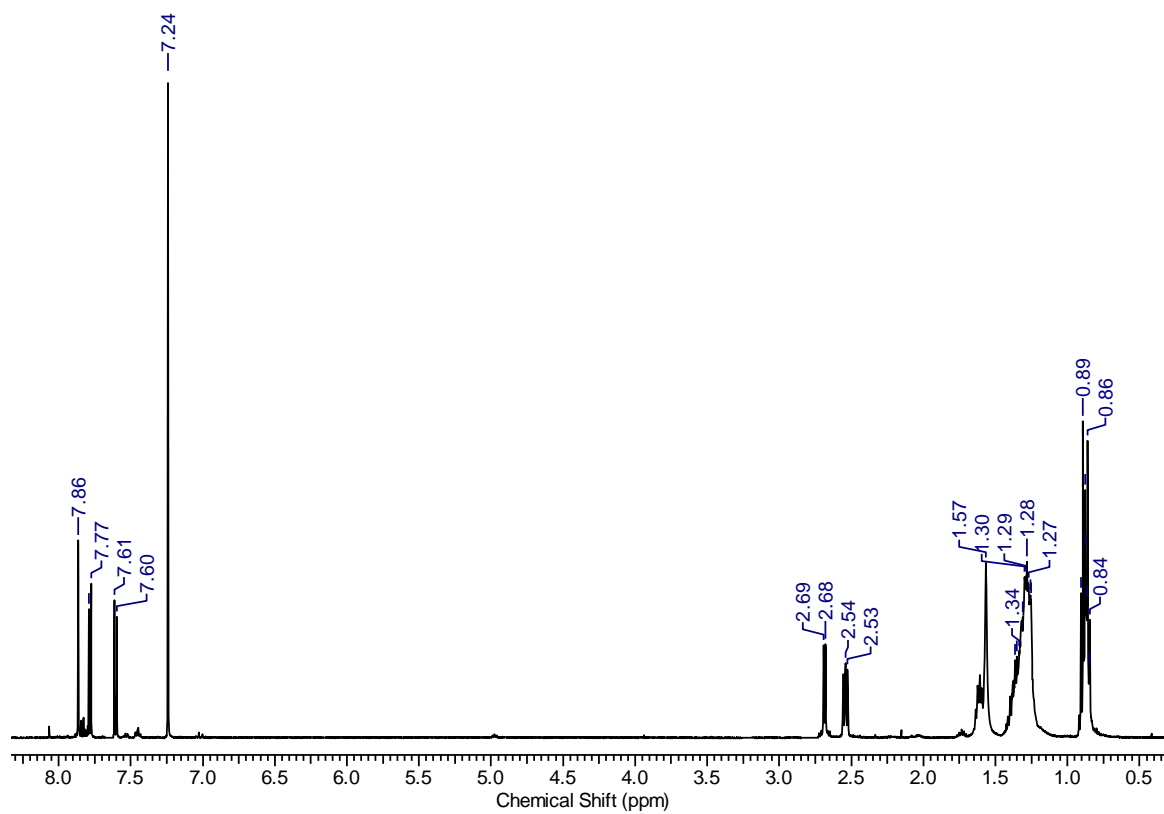

**Figure S6.**  $^1\text{H}$  NMR spectrum of compound **2a**

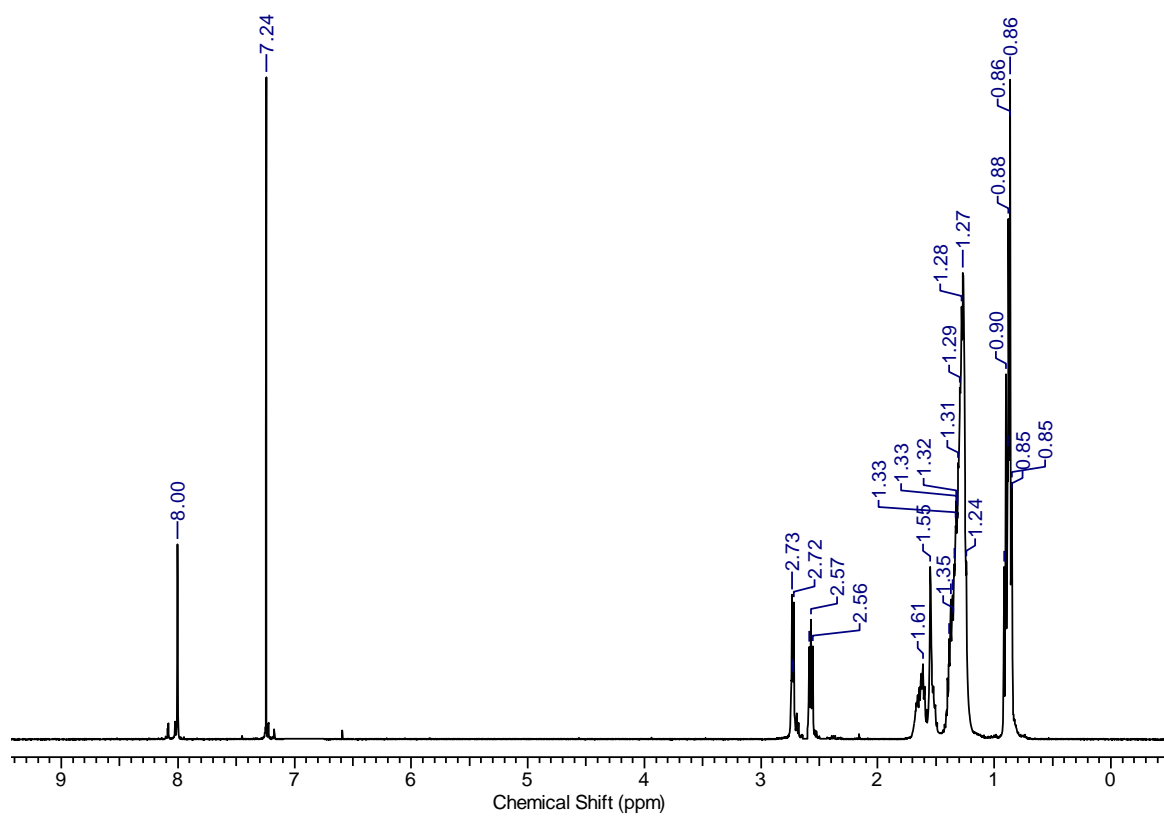

**Figure S7.**  $^1\text{H}$  NMR spectrum of compound **2b**

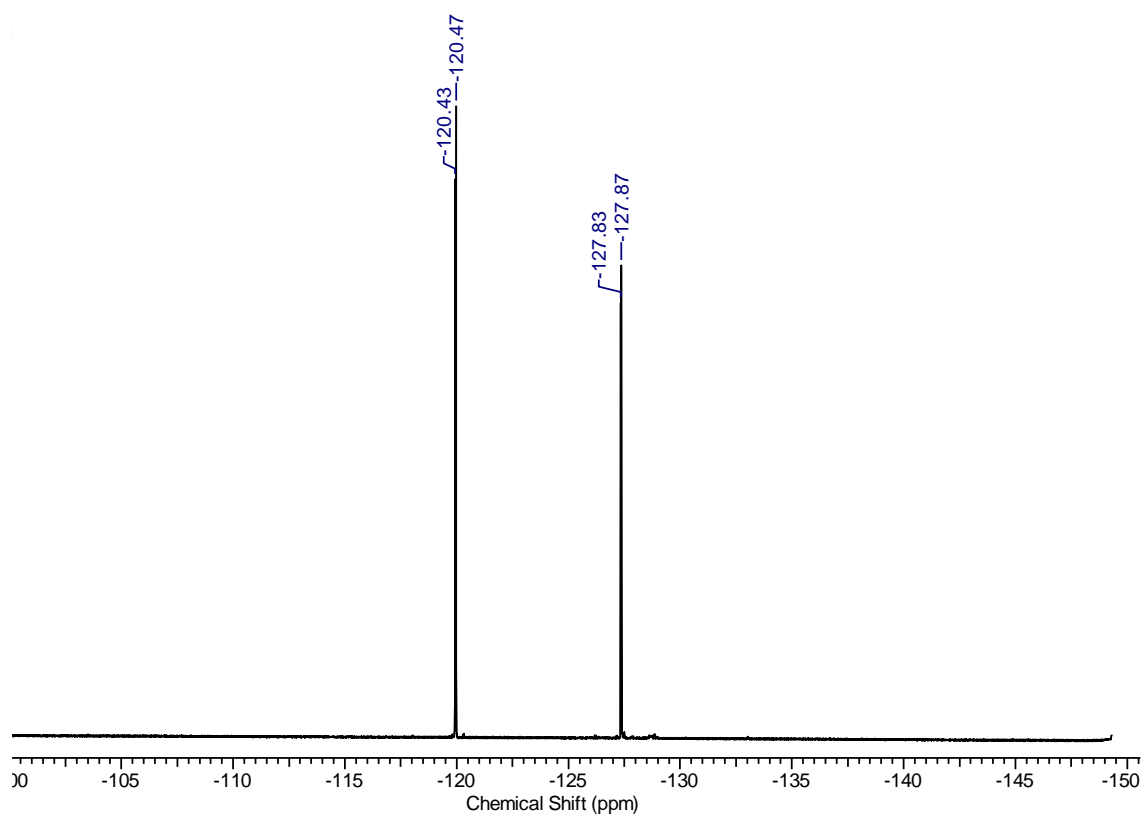

**Figure S8.** <sup>19</sup>F NMR spectrum of compound **2b**

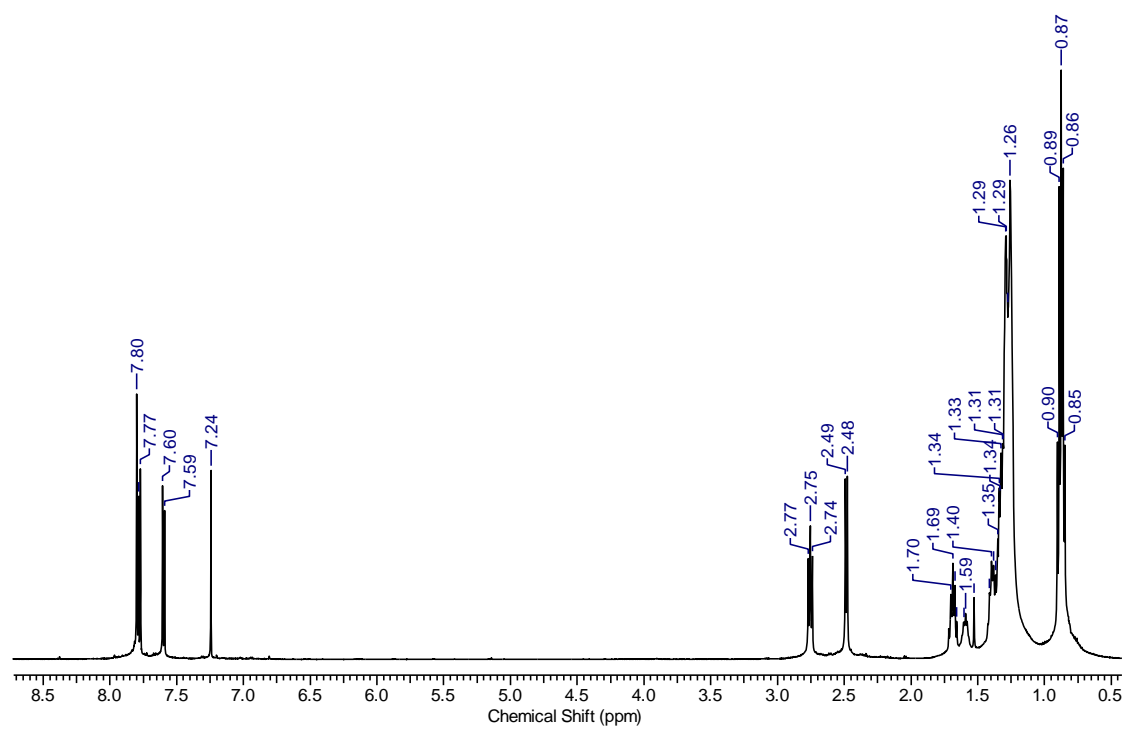

**Figure S9.** <sup>1</sup>H NMR spectrum of compound **2c**

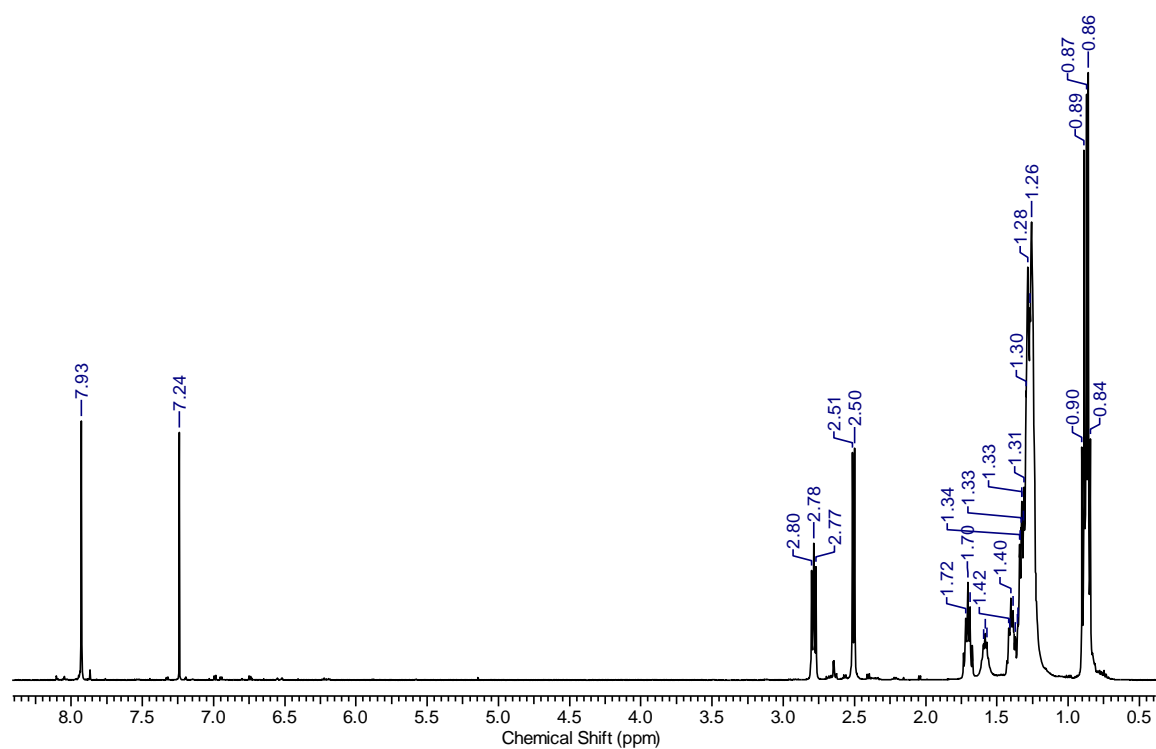

**Figure S10.** <sup>1</sup>H NMR spectrum of compound **2d**

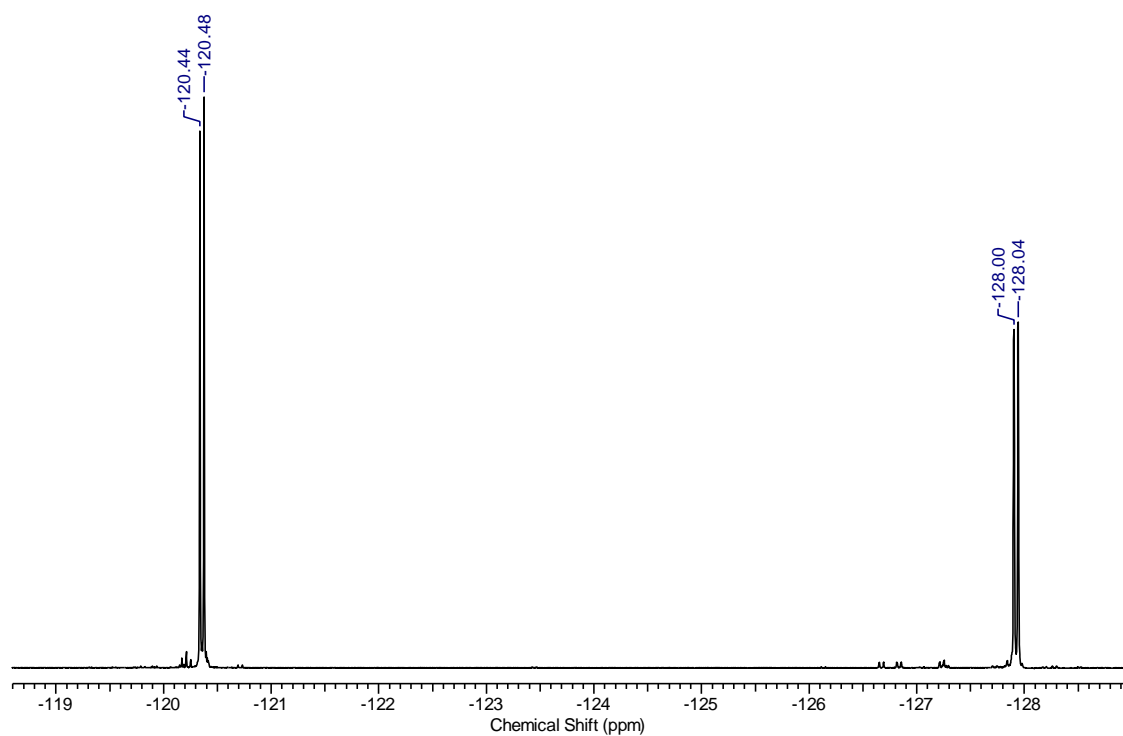

**Figure S11.** <sup>19</sup>F NMR spectrum of compound **2d**

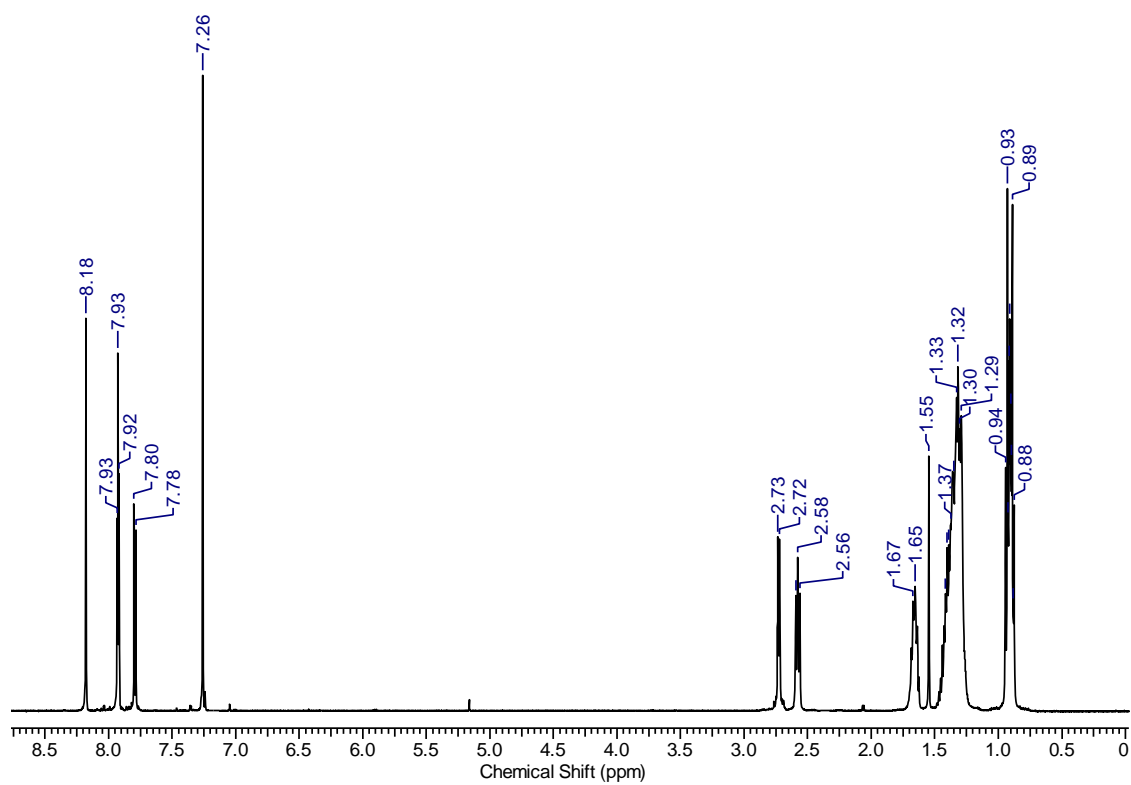

**Figure S12.** <sup>1</sup>H NMR spectrum of compound H1

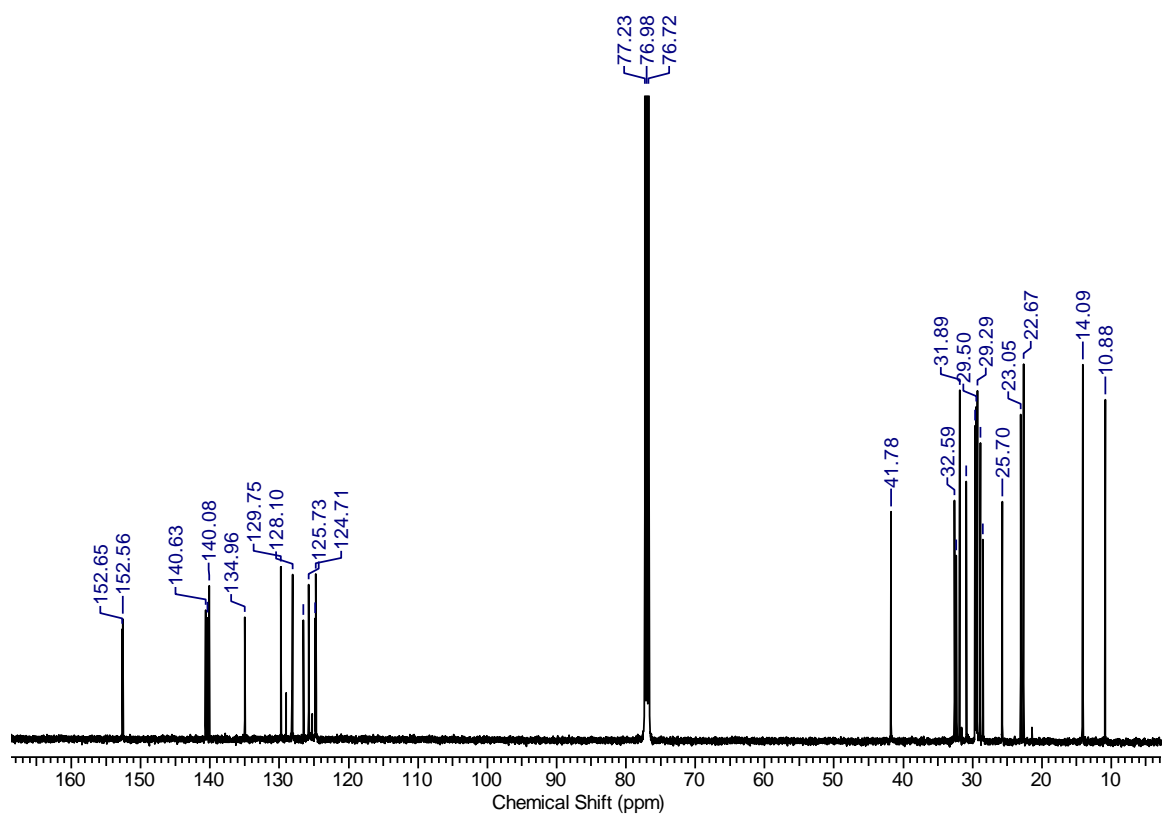

**Figure S13.** <sup>13</sup>C NMR spectrum of compound H1



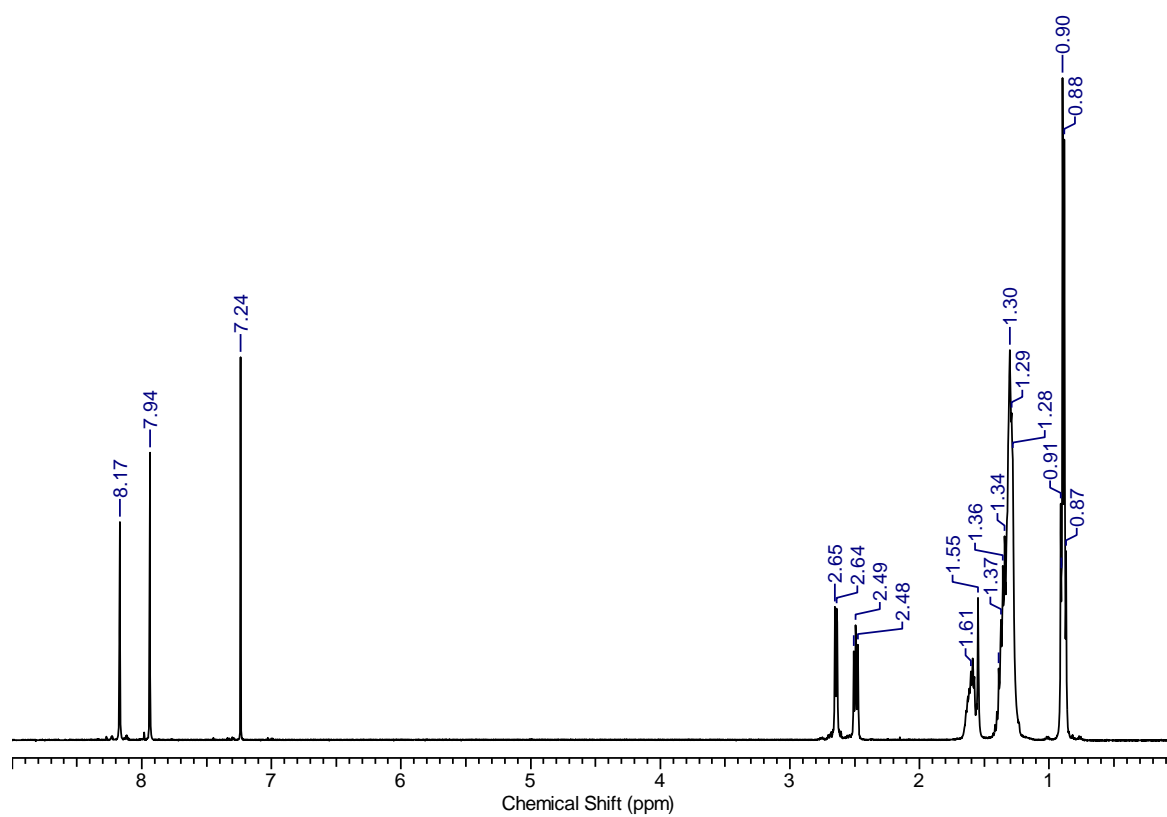

**Figure S14.** <sup>1</sup>H NMR spectrum of compound H2

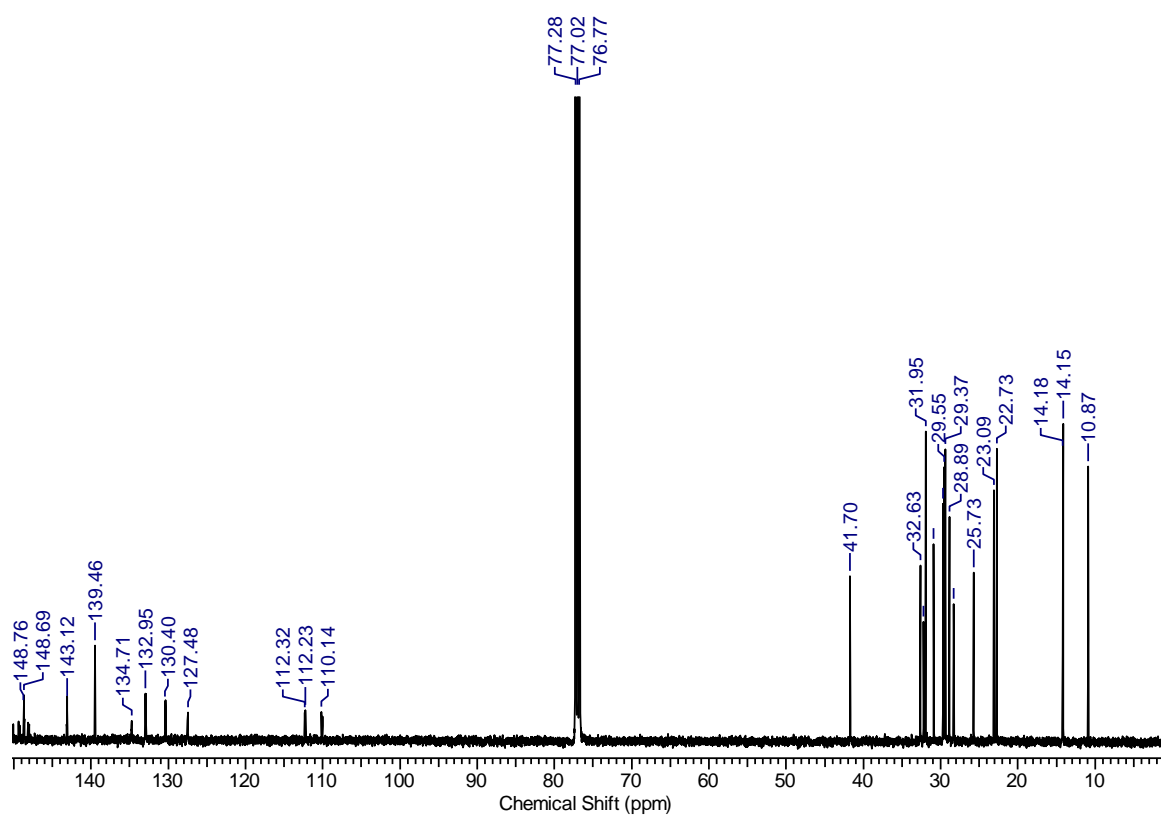

**Figure S15.** <sup>13</sup>C NMR spectrum of compound H2

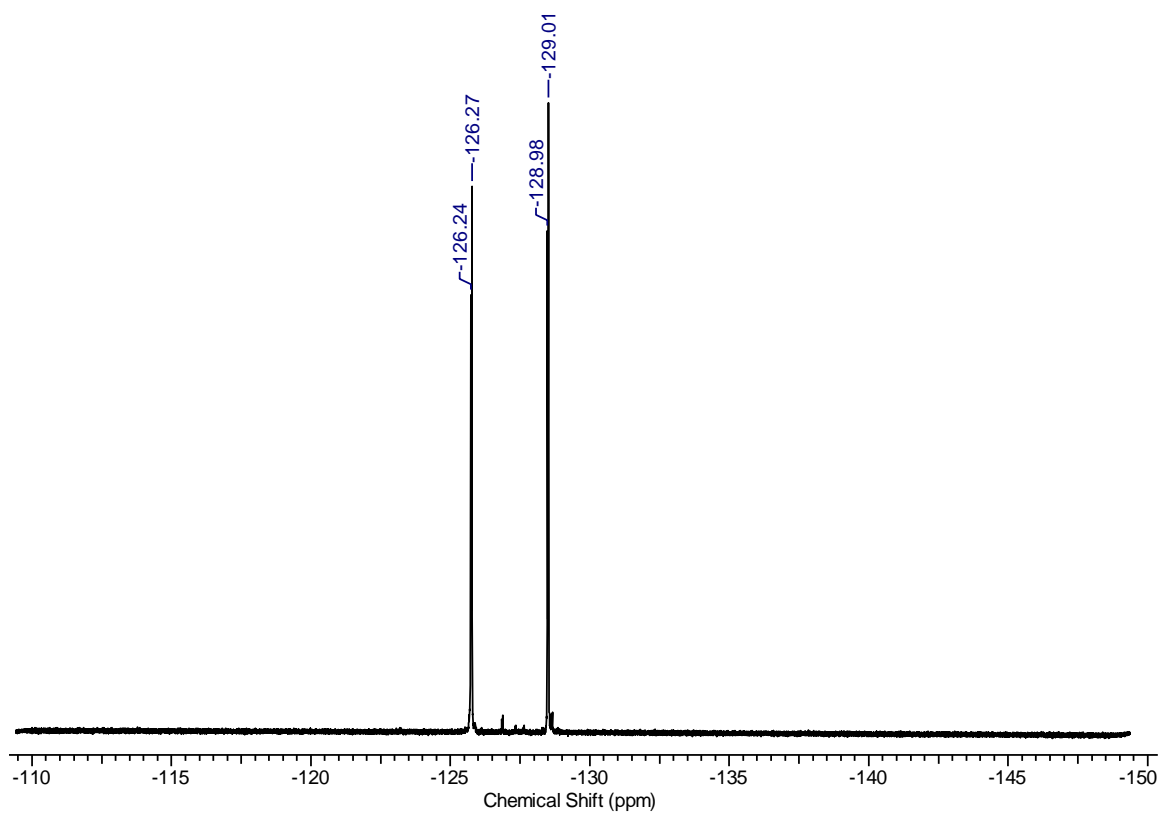

**Figure S16.**  $^{19}\text{F}$  NMR spectrum of compound H2

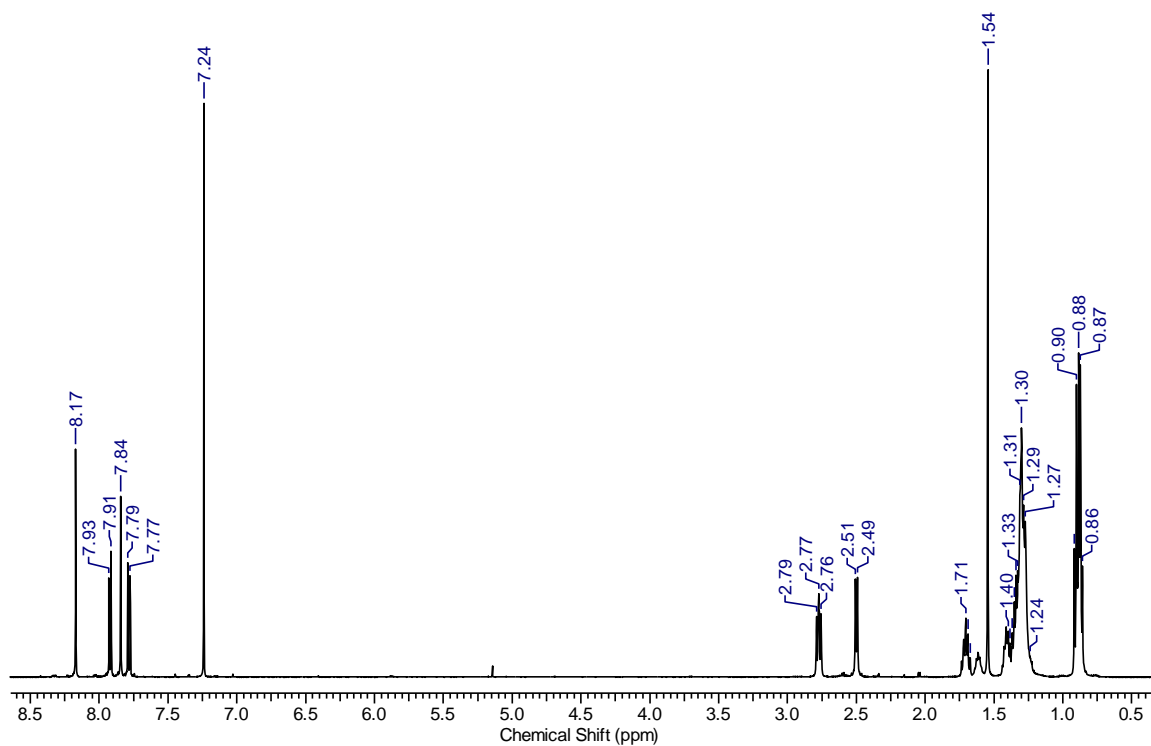

**Figure S17.**  $^1\text{H}$  NMR spectrum of compound H3

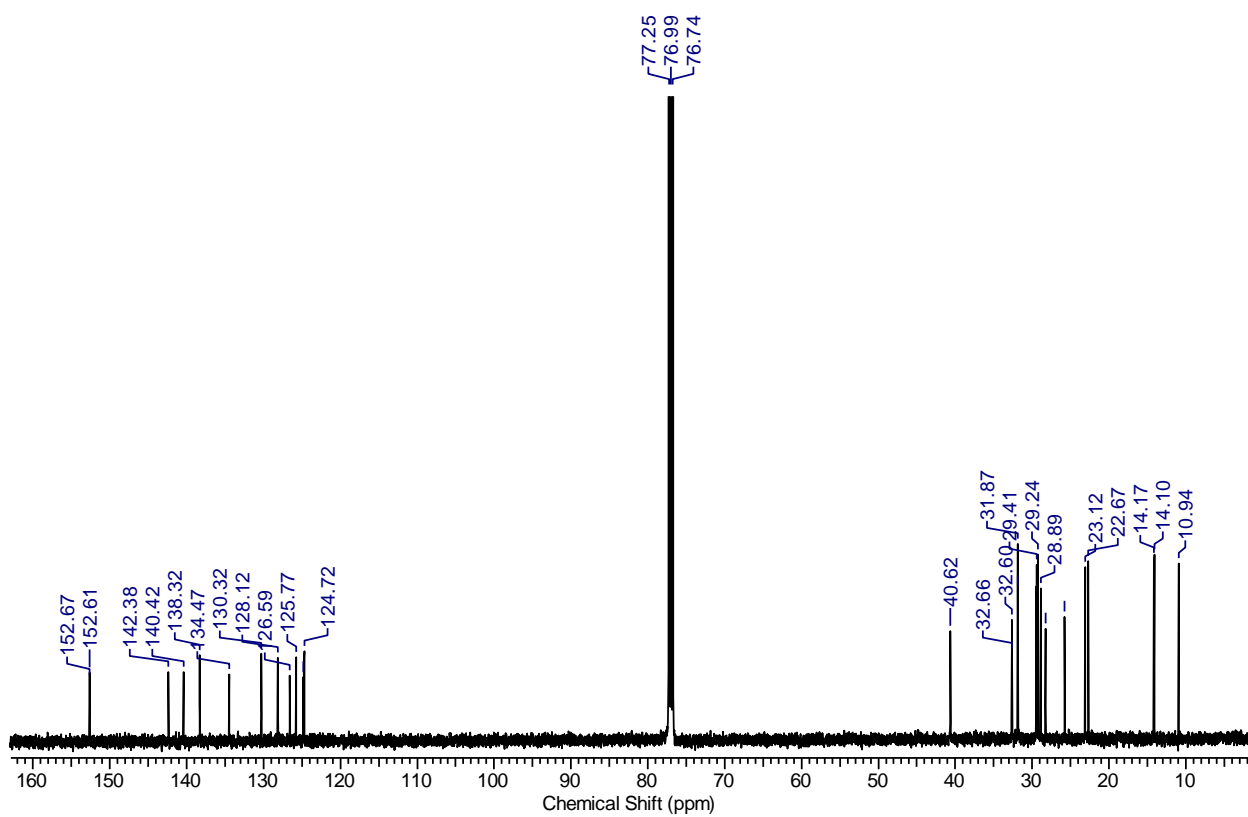

Figure S18. <sup>13</sup>C NMR spectrum of compound H3

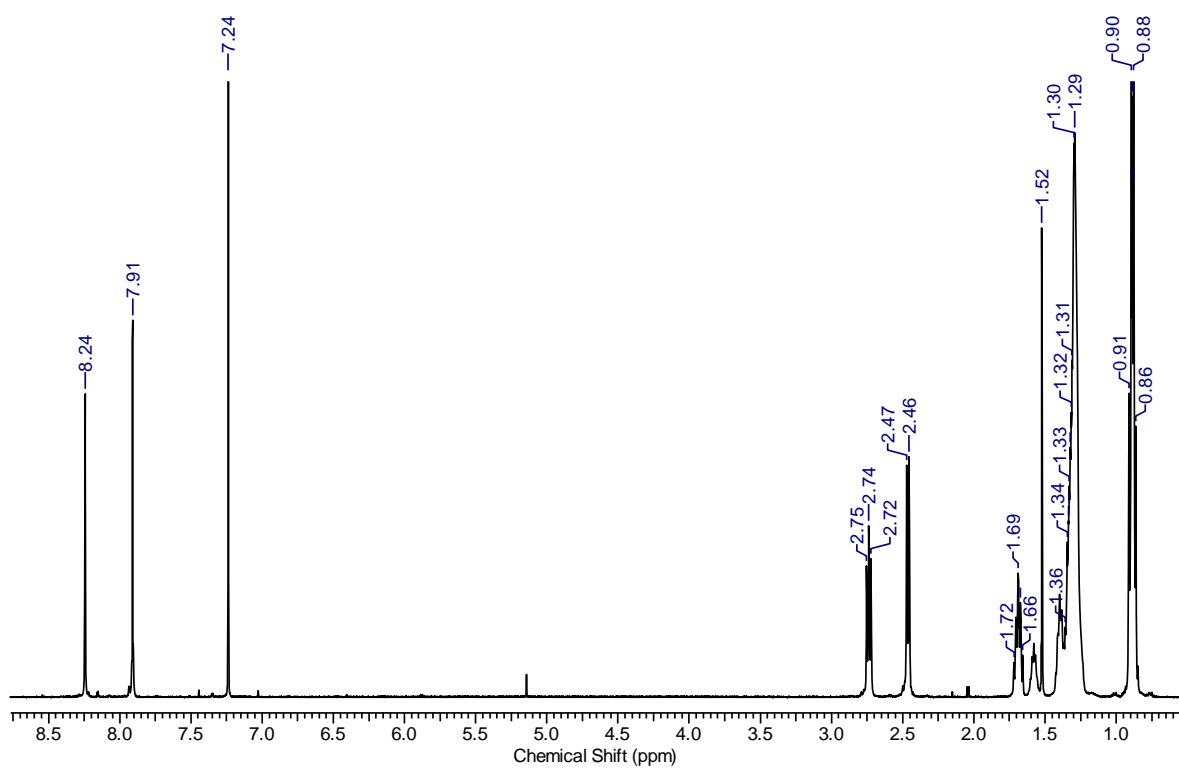

Figure S19. <sup>1</sup>H NMR spectrum of compound H4

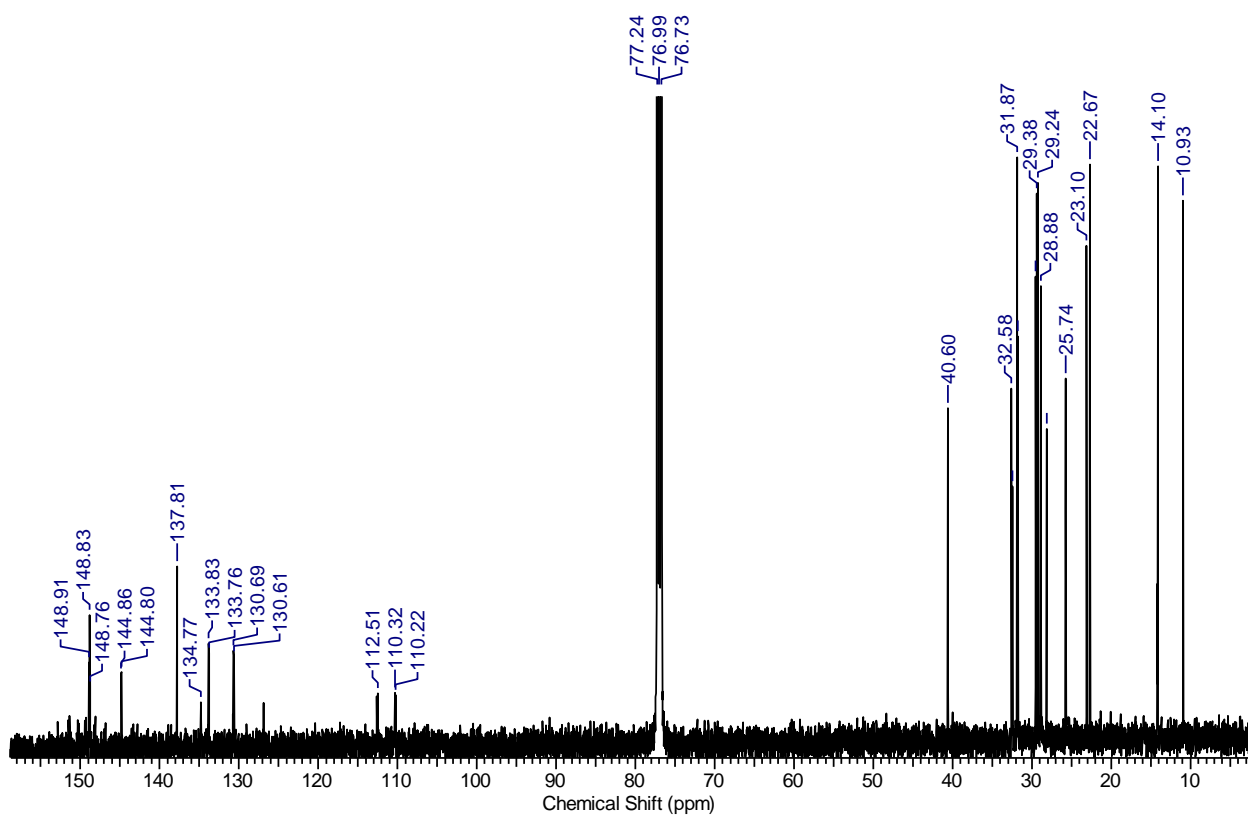

Figure S20. <sup>13</sup>C NMR spectrum of compound H4

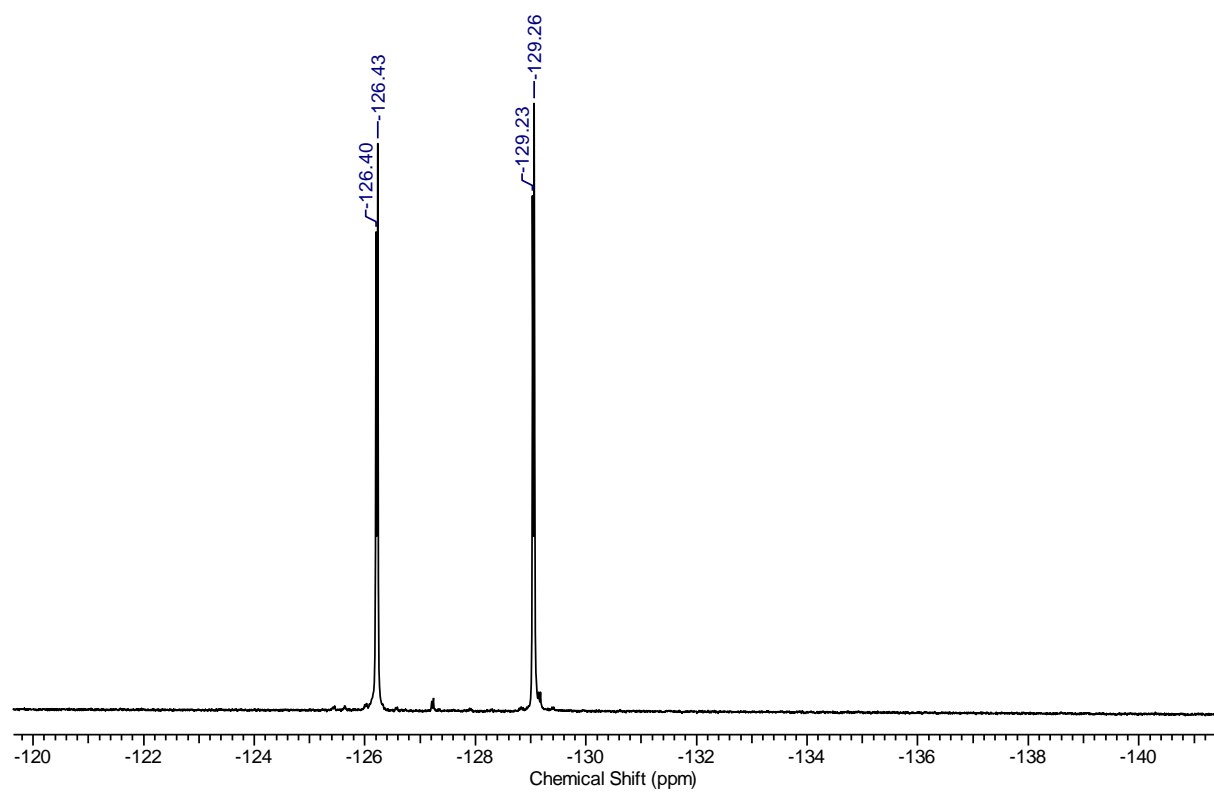

Figure S21. <sup>19</sup>F NMR spectrum of compound H4
